# Supplementary material for: The PHD finger of Arabidopsis SIZ1 recognizes trimethylated histone H3K4 mediating SIZ1 function and abiotic stress response
Source: PubMed Central journal article supplement (PMC6954211; doi:10.1038/s42003-019-0746-2), 2020-01-10
Supplement: 42003_2019_746_MOESM1_ESM.pdf [file 42003_2019_746_MOESM1_ESM.pdf]

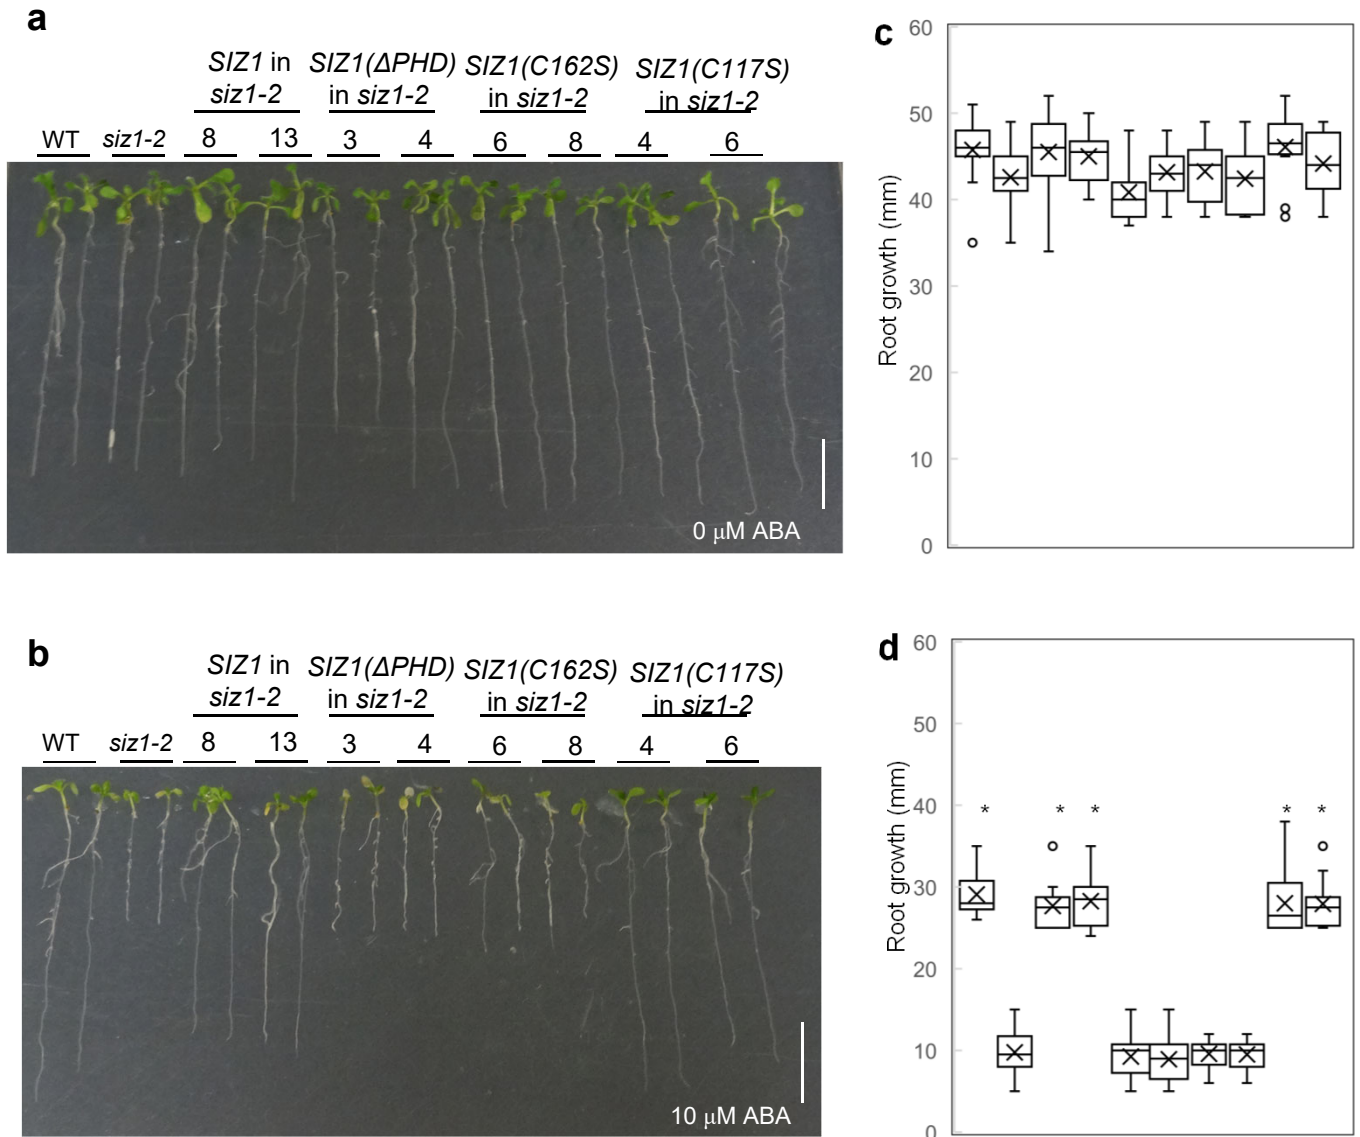

Supplementary Figure 1. *SIZ1* with mutation in the PHD finger was unable to complement ABA inhibition of primary root growth in seedlings of the *siz1* mutant. Three-day-old seedlings were transferred onto the basal media containing 0 (a) or 10  $\mu$ M ABA (b). Photographs are of representative seedlings 6 days after transfer onto the media. The bar indicates 1-cm length. Root growth on the media without (c) or with 10  $\mu$ M ABA (d) was measured. The order of the values are same as Supplementary Fig. S1a or S1b. The values are mean  $\pm$  standard deviation (SD; n = 12). Asterisk indicates a significant difference from the *siz1-2* plants ( $p < 0.05$ ) as determined by Student's *t*-test.

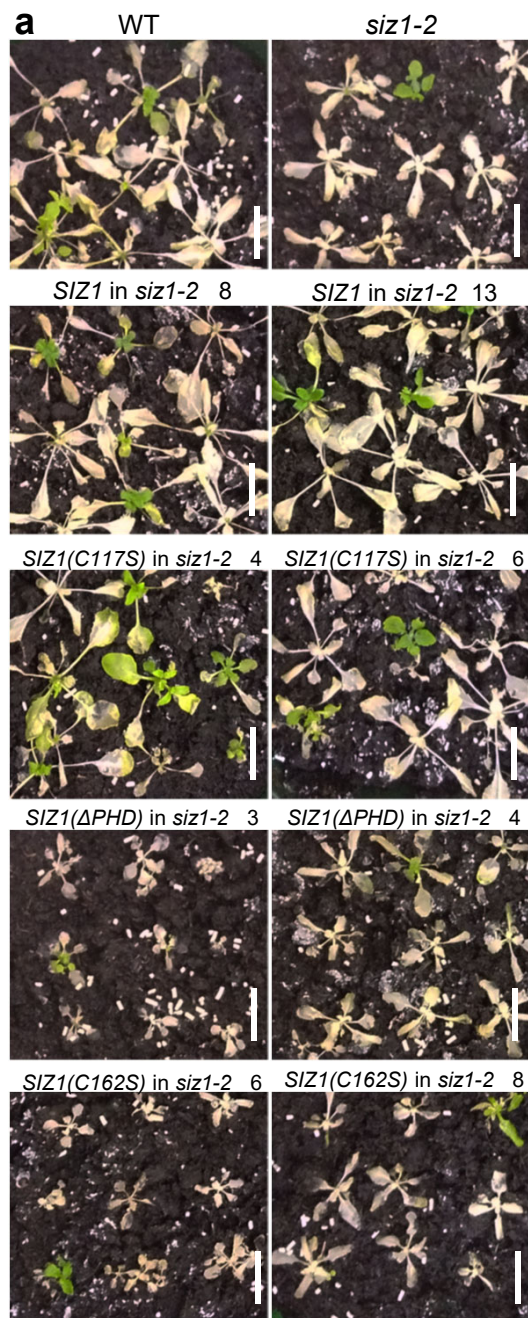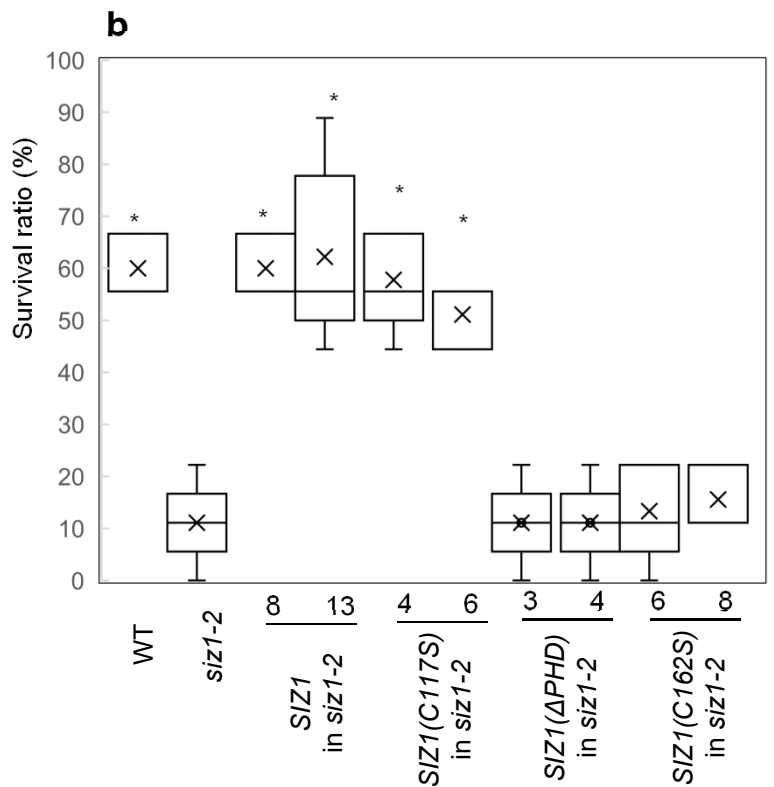

Supplementary Figure 2. *SIZ1* with mutation in the PHD finger was unable to complement cold sensitivity of the *siz1-2* mutant. **a**. Three-week-old plants were incubated at 4°C for 1 week for cold acclimation. Cold-acclimated plants were exposed for 4 h at -7°C. After freezing treatment, plants were incubated at 4°C for 1 day and done at 24°C for 1 week. Photographs are representative of WT, *siz1-2*, and *siz1-2* transformed with *SIZ1* variants. **b**. Survival was determined. Data are the mean  $\pm$  SD calculated from four independent experiments. Asterisks indicate a statistical difference from the *siz1-2* plants ( $p < 0.05$ ) as determined by Student's *t*-test. The bar indicates 2-cm length.

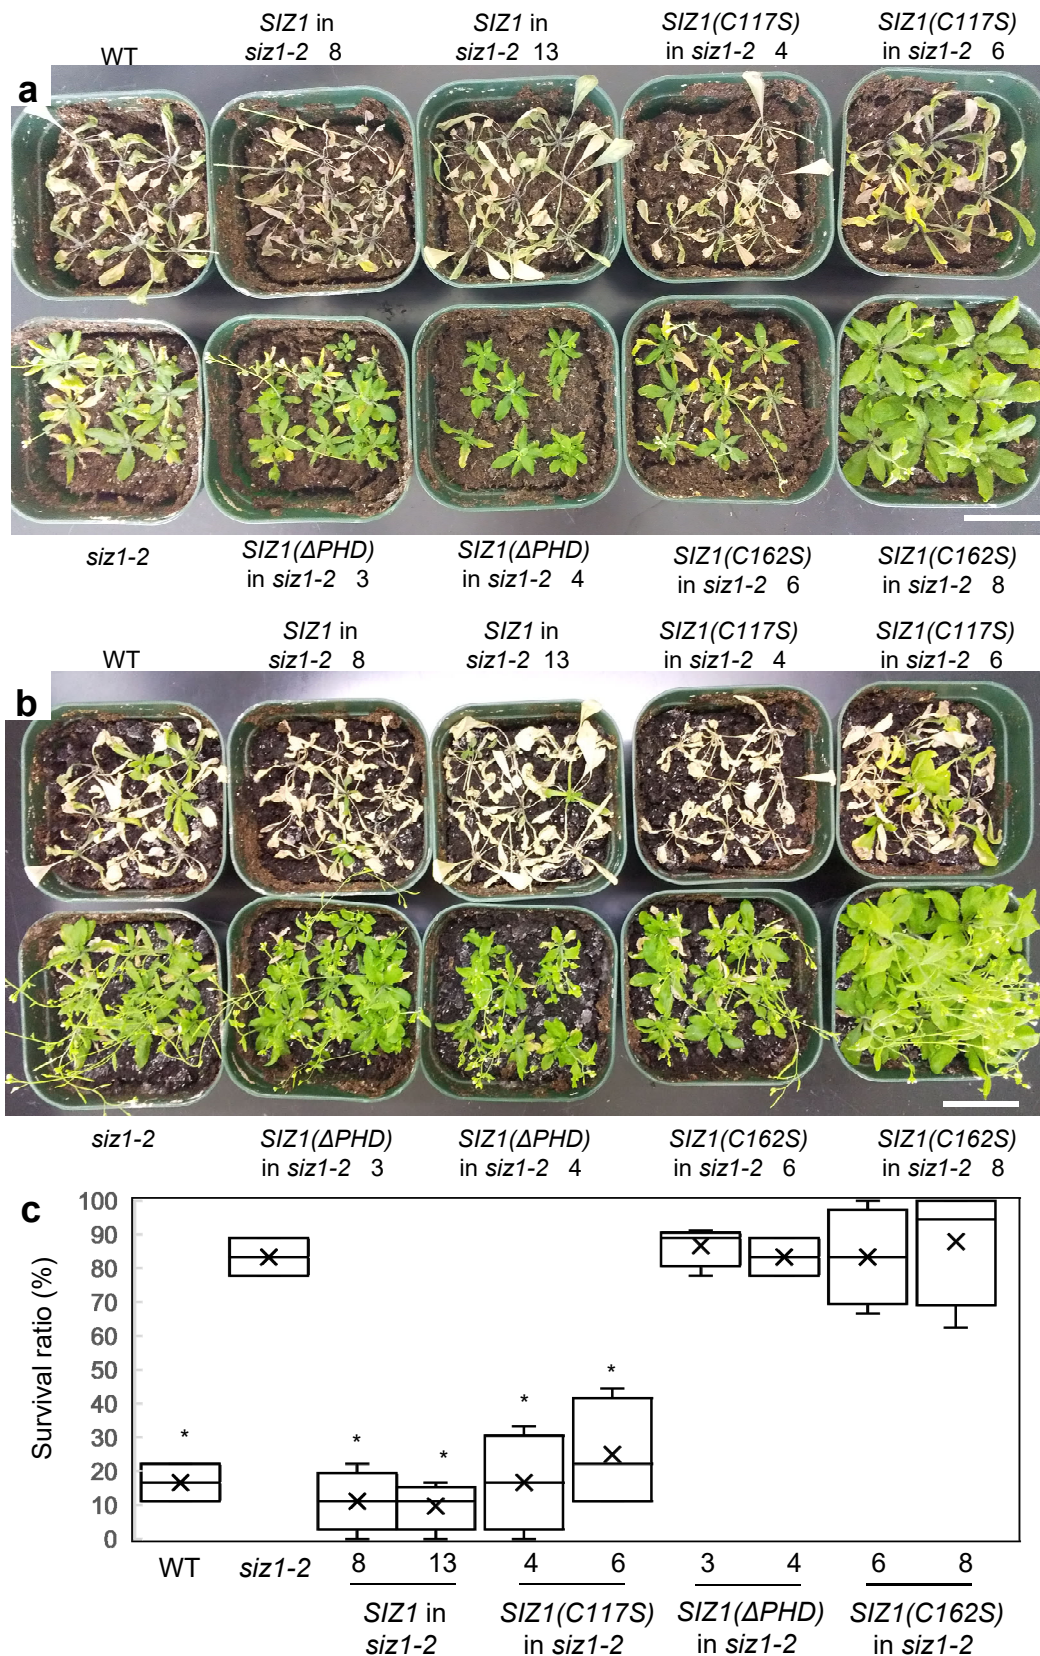

Supplementary Figure 3. *SIZ1* with mutation in the PHD finger was unable to complement drought tolerant phenotype of the *siz1-2* mutant. **a**, Water was withheld from 2-week-old plants for 18 days. **b**, Watering was resumed, and plants were incubated for 1 week. **c**, The survival ratio was determined for 9 plants after drought treatment. Data are mean  $\pm$  SE from four independent experiments. Asterisks indicate a statistical difference from the *siz1-2* plants ( $P < 0.05$ ) as determined by Student's *t*-test. The bar indicates 3-cm length.

**Supplementary Figure 4 (unprocessed blots)**

**Figure 6a**

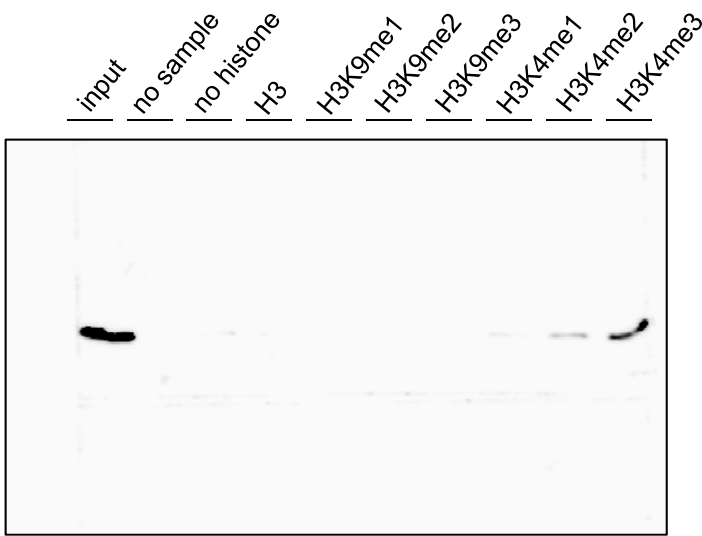

**Figure 6b**

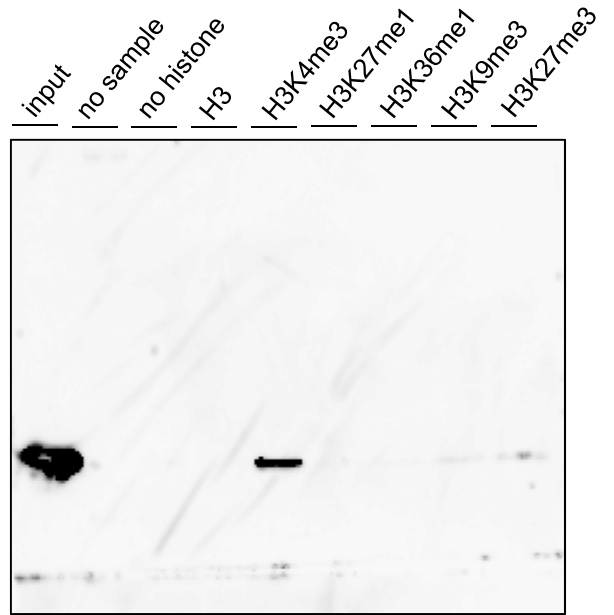

**Figure 6c**

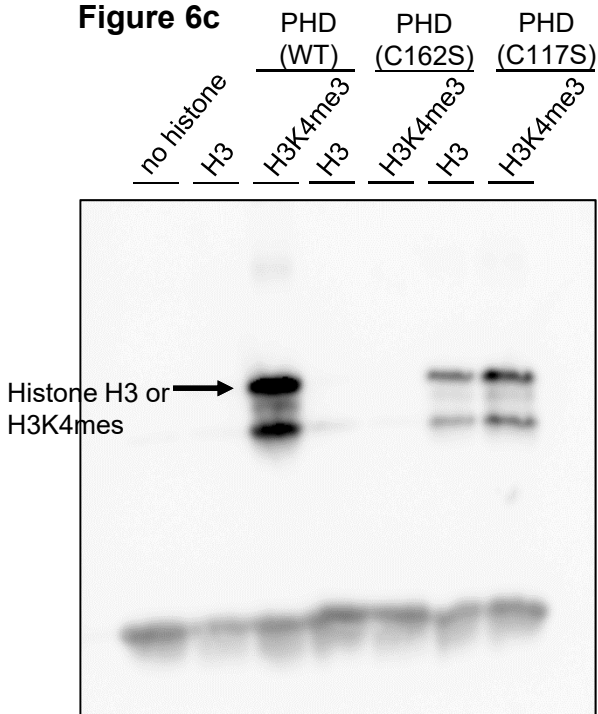

**Figure 6d**

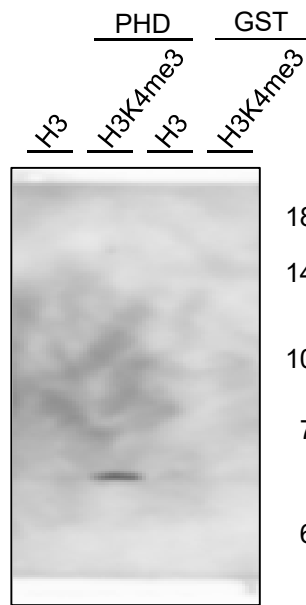

**Figure 8b**

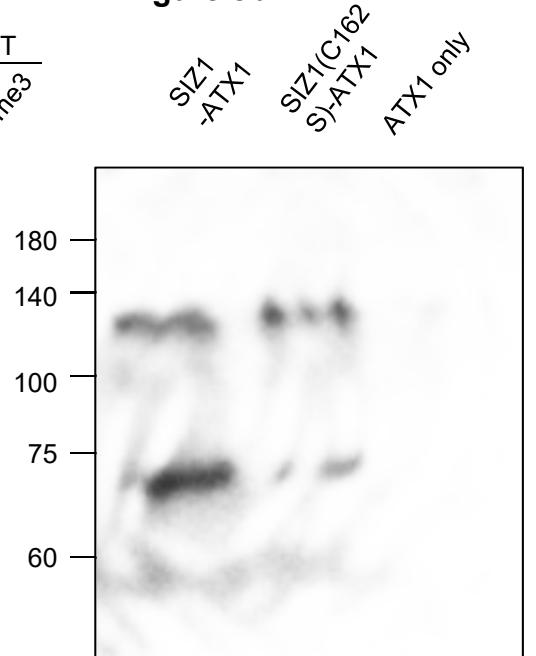

Supplementary Table 1. Primers used for plasmid construction

| Name of primer                                                    | DNA sequence (5'-to-3')                        |
|-------------------------------------------------------------------|------------------------------------------------|
| <b>pCambia1302-AtSIZ1full::AtSIZ1(<math>\Delta</math>PHD):GFP</b> |                                                |
| SIZ1-2hyF                                                         | GCTAGCATGGATTTTGGGAAGCTAATTG                   |
| SIZ1-2hyR                                                         | CACTAGTTTACTCAGAATCCGAGTCAAT                   |
| SIZ1-PHDdeltaF                                                    | CAACCAGAAATTAAAGTTCGACGACTTA                   |
| SIZ1-PHDdeltaR                                                    | TGGGTCAGCTCGAGTAAGTCGTCGAACT                   |
| <b>Detection of <i>siz1-2</i> mutation</b>                        |                                                |
| LP034008                                                          | CTGATGGTAGCCTTTGCCCT                           |
| RP034008                                                          | AAACCCGACTGAGCTGAAGCA                          |
| Salk_LBa1                                                         | TGGTTCACGTAGTGGGCCATCG                         |
| <b>pCambia1302-AtSIZ1full::AtSIZ1(C162S):GFP</b>                  |                                                |
| AtSIZ1-C162S-F                                                    | CATTTTATTCTGAAATCTGCCG                         |
| AtSIZ1-C162S-R                                                    | CGGCAGATTCAGAATAAAATG                          |
| <b>pCambia1302-AtSIZ1full::AtSIZ1(C117S):GFP</b>                  |                                                |
| AtSIZ1-C117S-F                                                    | CGATGTGTTTCAGGAAACTCGC                         |
| AtSIZ1-C117S-R                                                    | GCGAGTTTCCTGAAACACATCG                         |
| <b>GST-PHD</b>                                                    |                                                |
| pGEX5X-PHD-F                                                      | TGGGATCCCCGAATTCTGTGTTTGTGGAAACTCGCT<br>AGAAAC |
| pGEX5X-PHD-R                                                      | GGCCGCTCGAGTCGACGCAGATTTACAATAAAAT<br>GATTCC   |
| <b>pMAL-ATX1SET</b>                                               |                                                |
| ATX1SET-F-SalI                                                    | TAGAGTCGACAGGGAAACATACAGGAAGAG                 |
| ATX1-SalI-R                                                       | CCGAGTCGACTTATTCTGCGGTCCAGTC                   |
| <b>pMAL-ATX2SET</b>                                               |                                                |
| ATX2SET-F-SalI                                                    | AACCGTCGACAAGAGATTAGCATTCCGGGAA                |
| ATX2-SalI-R                                                       | CCGAGTCGACTCAGGACTCTGTCCACTC                   |
| <b>pMAL-ATX3SET</b>                                               |                                                |
| ATX3SET-F-BamHI                                                   | ATTCGGATCCCGGCTAAAACATTTGCAGAG                 |
| ATX3-BamHI-R                                                      | CCGAGGATCCCTAGTTCATGAATTTGCG                   |
| <b>pMAL-ATX4SET</b>                                               |                                                |
| ATX4SET-F-BamHI                                                   | TTTCTGGATCCAGGGAACGACTTCACC                    |
| ATX4-BamHI-R                                                      | CGAGGATCCCTAATTCATGAATTTCTGCA                  |
| <b>pMAL-ATX5SET</b>                                               |                                                |
| ATX5SET-F-BamHI                                                   | TTTCCGGATCCAGGGAACGGCTTCACC                    |
| ATX5-BamHI-R                                                      | GAGGATCCATTCATGAATTTCTGCA                      |

Supplementary Table 1. (continued)

| Name of primer           | DNA sequence (5'-to-3')                                                                   |
|--------------------------|-------------------------------------------------------------------------------------------|
| <b>pBYR2HS-CFH</b>       |                                                                                           |
| pBYR2HS-Flag-F           | ACTGTTGATAGTCGACATGGACTACAAGGACGAT<br>GACGACAAGG                                          |
| FLAG-His                 | CAAGGACGATGACGACAAGGTCGAGATGGATTA<br>TAAGGATGACGATGACAAGGTTGAGCATCACCAT<br>CACCA          |
| pBYR2HS-FlagHis-R        | ATTCAGAATTGTCGATTAGTGGTGGTGGTGGTGA<br>TGCTCAAC                                            |
| <b>pBYR2HS-CRH</b>       |                                                                                           |
| pBYR2HS-HRV3C-F          | ACTGTTGATAGTCGACCTTGAGGTTTTGTTCCAGG<br>GTCC                                               |
| HRV3C-RAP-His            | CTTGAGGTTTTGTTCCAGGGTCCTGACATGGTGAA<br>TCCTGGTCTTGAGGATAGGATCGAGCATCATCACC<br>ACCATCACTAA |
| pBYR2HS-stopHis-R        | ATTCAGAATTGTCGATTAGTGATGGTGGTGGTGGT<br>G                                                  |
| <b>pBYR2HS-AtSIZ1-FH</b> |                                                                                           |
| pBYR2HS-AtSIZ1-F         | CACTGTTGATAGTCGATGGATTTGGAAGCTAATTG<br>TAAGG                                              |
| pBYR2HS-AtSIZ1-R         | TGTAGTCCATGTCGACCTCAGAATCCGAGTCAATG<br>GAGAGG                                             |
| <b>pBYR2HS-ATX1-RH</b>   |                                                                                           |
| pBYR2HS-ATX1-F           | CACTGTTGATAGTCGATGGCGTGTTTTTCTAACGA<br>AACCC                                              |
| pBYR2HS-ATX1-R           | AAACCTCAAGGTCGACTTCTGCGGTCCAGTCTATT<br>AGATCAC                                            |

Supplementary Table 2. Primers used for detection of transcripts and for ChIP analysis

| Name of primer                                   | DNA sequence (5'-to-3')      |
|--------------------------------------------------|------------------------------|
| <b><i>SIZ1</i></b>                               |                              |
| LP023805                                         | GCTGACGTTTCAGGAGGTTTAGTTG    |
| RP023805                                         | GCCTTGTCTTGTCTACTGTCATTCATAC |
| <b>WRKY70-ChIP</b>                               |                              |
| WRKY70-ChipF                                     | CTTCAAACCTTGCCGTCGTTA        |
| WRKY70-ChipR                                     | ATCTCCTCCTCCTCATCCCT         |
| <b>pCambia1302-AtSIZ1full::AtSIZ1(C162S):GFP</b> |                              |
| AtSIZ1-C162S-F                                   | CATTTTATTCTGAAATCTGCCG       |
| AtSIZ1-C162S-R                                   | CGGCAGATTTTCAGAATAAAAATG     |
| <b>pCambia1302-AtSIZ1full::AtSIZ1(C117S):GFP</b> |                              |
| AtSIZ1-C117S-F                                   | CGATGTGTTTCAGGAAACTCGC       |
| AtSIZ1-C117S-R                                   | GCGAGTTTCCTGAAACACATCG       |
